# Supplementary material for: Calreticulin regulates vascular endothelial growth factor-A mRNA stability in gastric cancer cells
Source: PubMed Central journal article supplement (PMC6855450; doi:10.1371/journal.pone.0225107), 2019-11-14

## S6 Fig: Full-length membranes and gels

### Full-length membranes for Fig. 1a

Stage I, II -1, anti-CRT

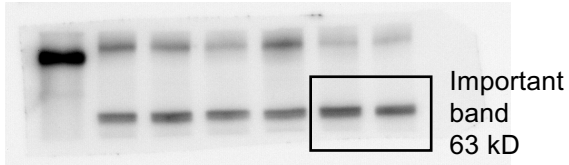

Stage I, II -1, anti-VEGFA

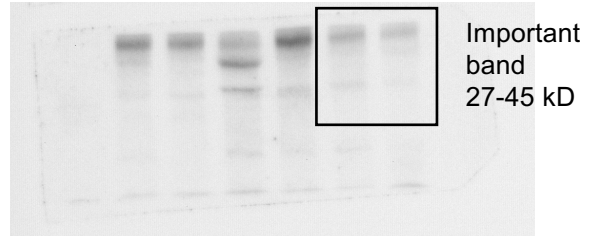

Stage I, II -1, anti-GAPDH

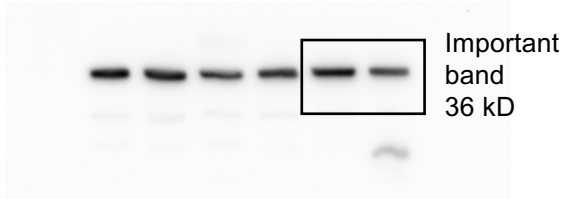

Stage I, II -2, anti-CRT

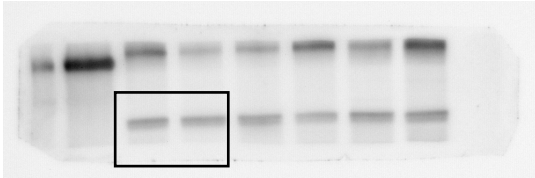

Stage I, II -2, anti-VEGFA

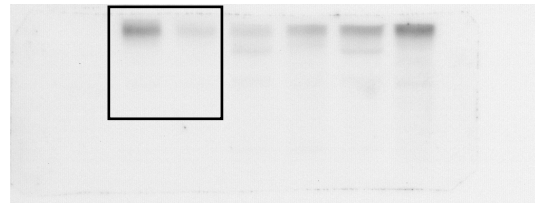

Stage I, II -1, anti-GAPDH

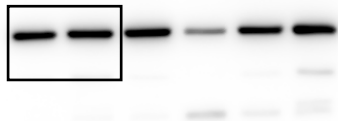

Stage III, IV -1, anti-CRT

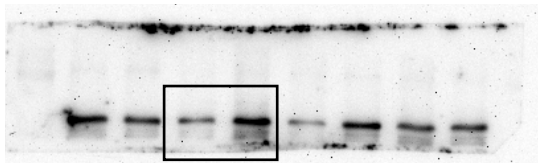

Stage III, IV -1, anti-VEGFA

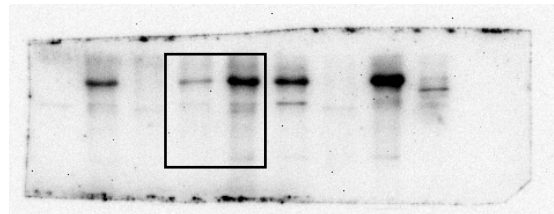

Stage III, IV -1, anti-GAPDH

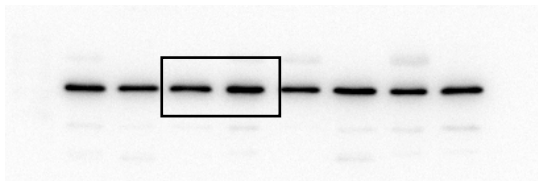

Stage III, IV -2, anti-CRT

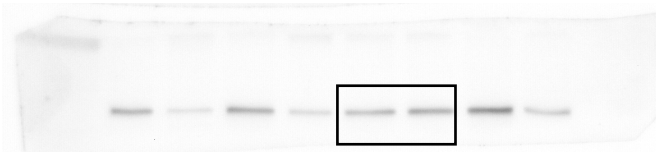

Stage III, IV -2, anti-VEGFA

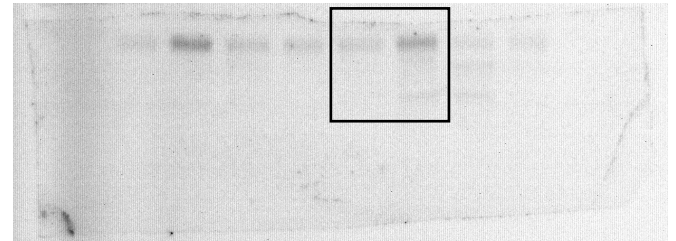

Stage III, IV -2, anti-GAPDH

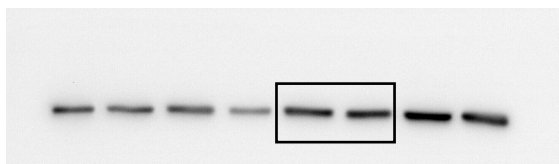

**Full-length membranes for Fig. 3a**

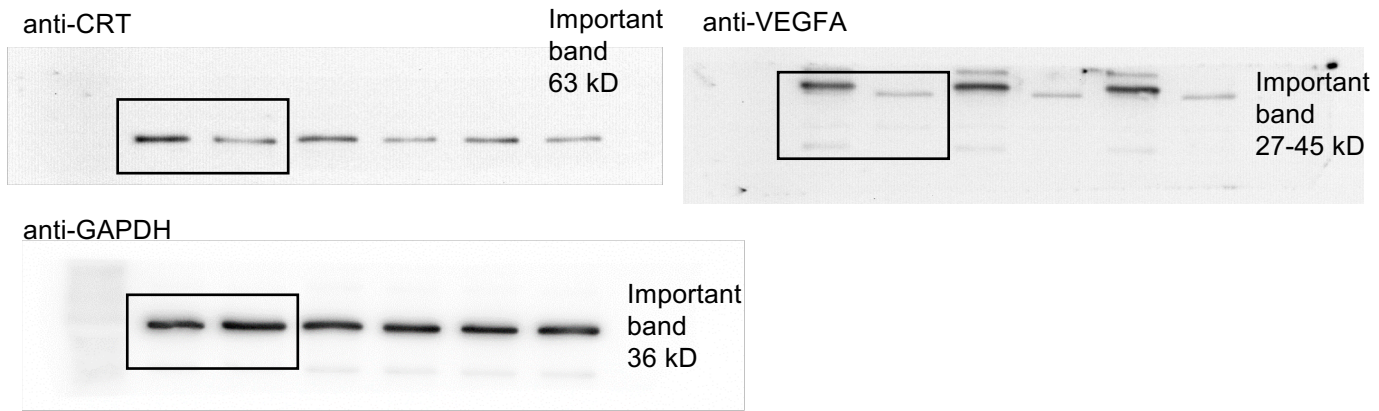

**Full-length membranes for S1a Fig.**

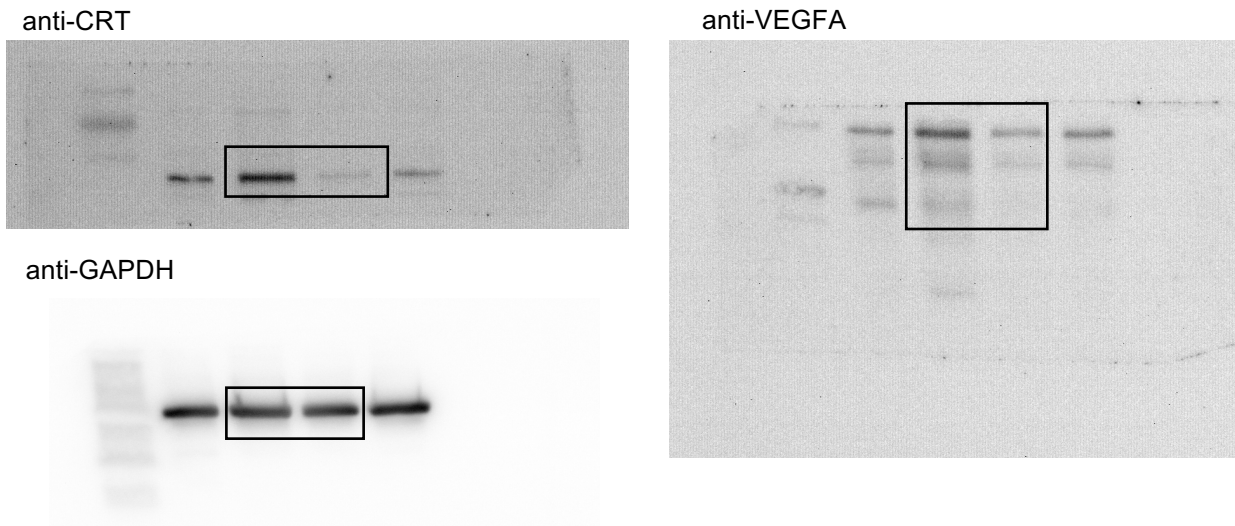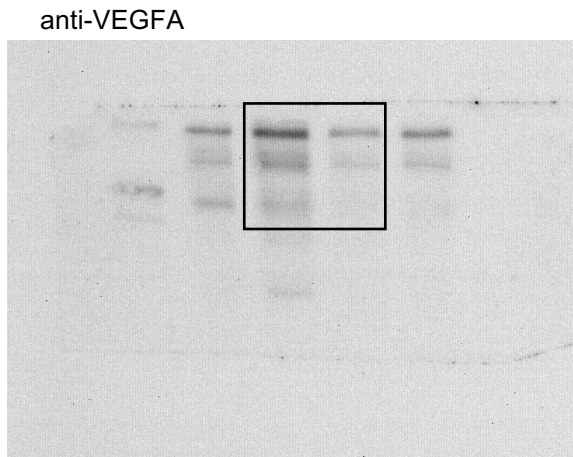

**Full-length membranes for S2a Fig.**

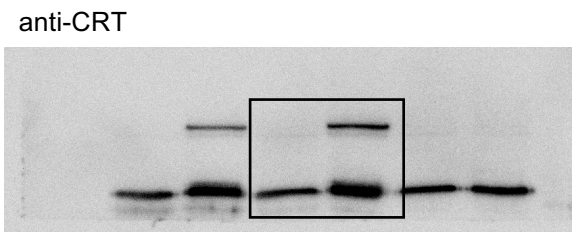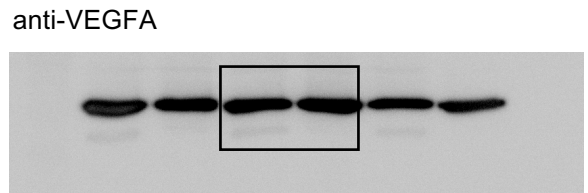

**anti-GFP**

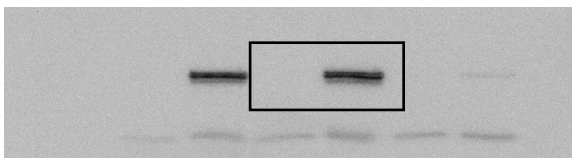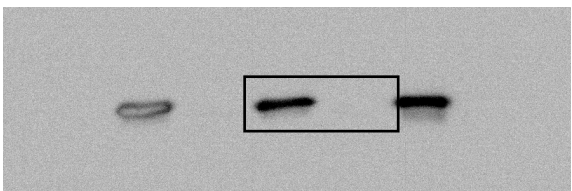

**Full-length membranes for Fig 4**

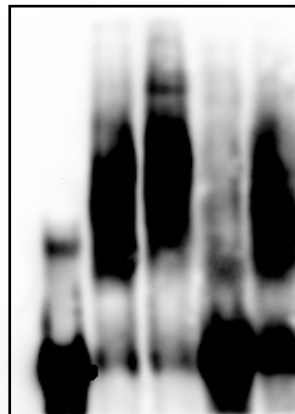

Full-length membranes for S3 Fig.

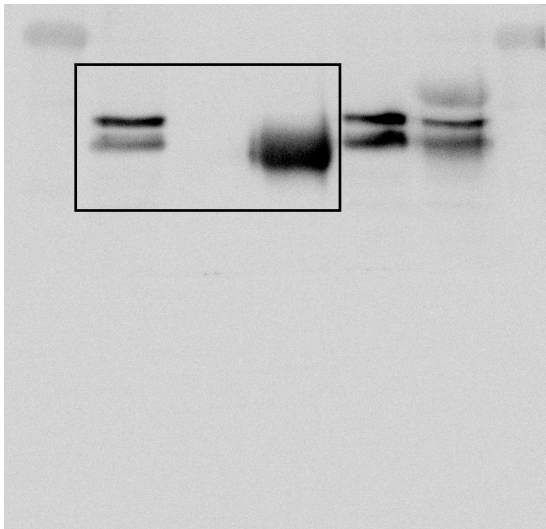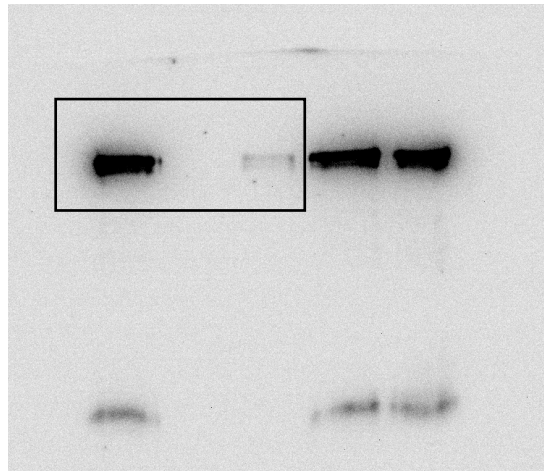

Full-length membranes for S4 Fig.

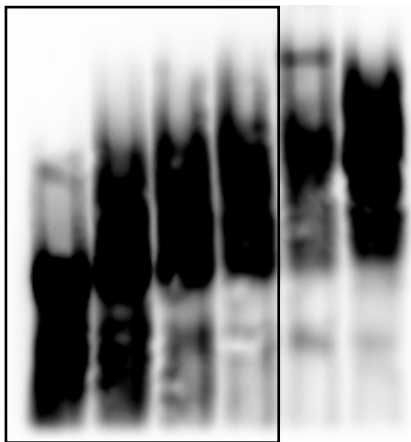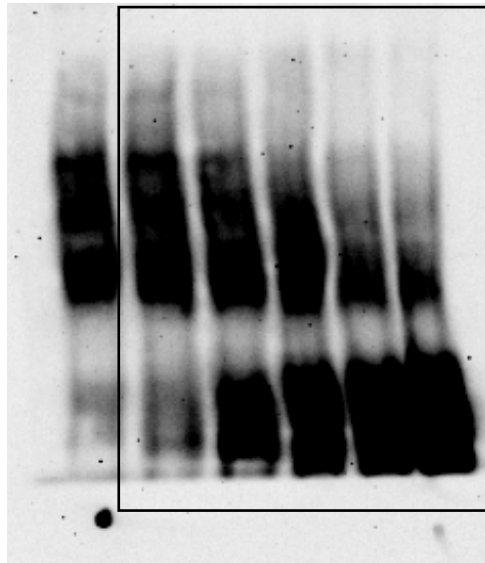

Full-length membranes for S5 Fig.

anti-CRT

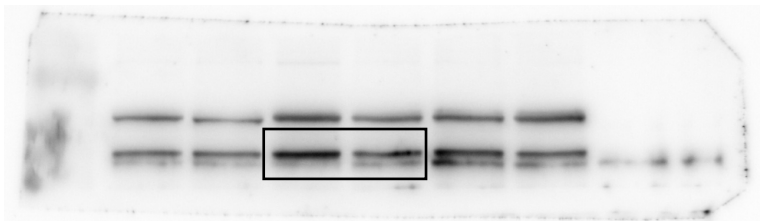

anti-HSP70

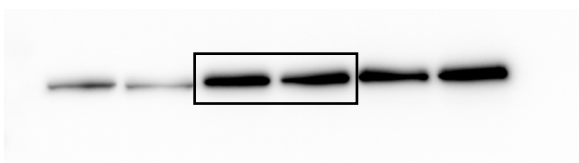

anti-GAPDH

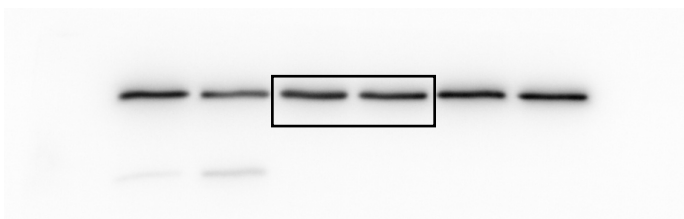

Supplement: pone.0225107.s006.pdf [file pone.0225107.s006.pdf]
